# Supplementary material for: Stromal-Like Cells Are Found in Peripheral Blood of Patients With Inflammatory Bowel Disease and Correlate With Immune Activation State
Source: PubMed Central journal article supplement — Clin Transl Gastroenterol. 2024 Jun 1;15(9):e1. doi: 10.14309/ctg.0000000000000721 (PMC11421714; doi:10.14309/ctg.0000000000000721), 2024-06-01
Supplement: ct9-15-e1e-s001.pdf [file ct9-15-e1e-s001.pdf]

**A**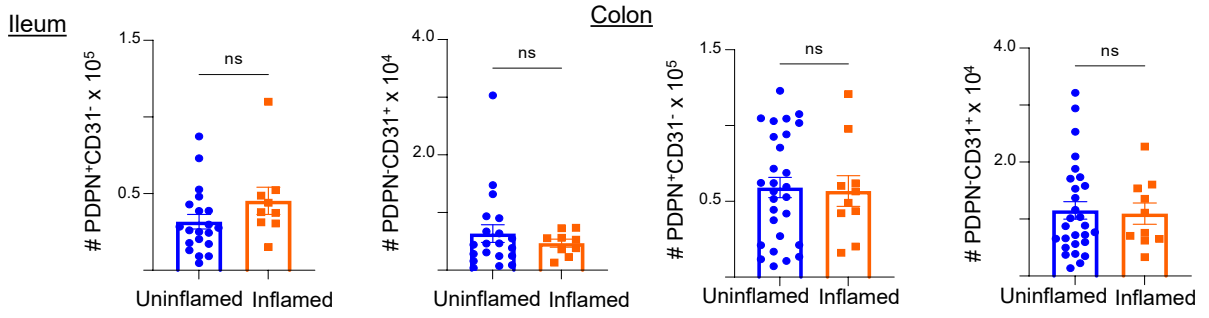**B**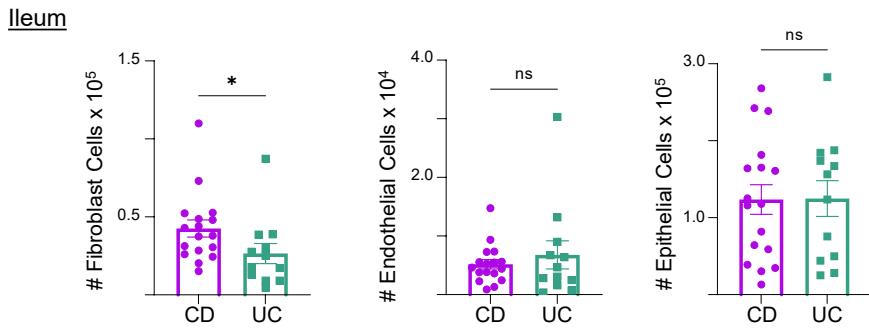**C**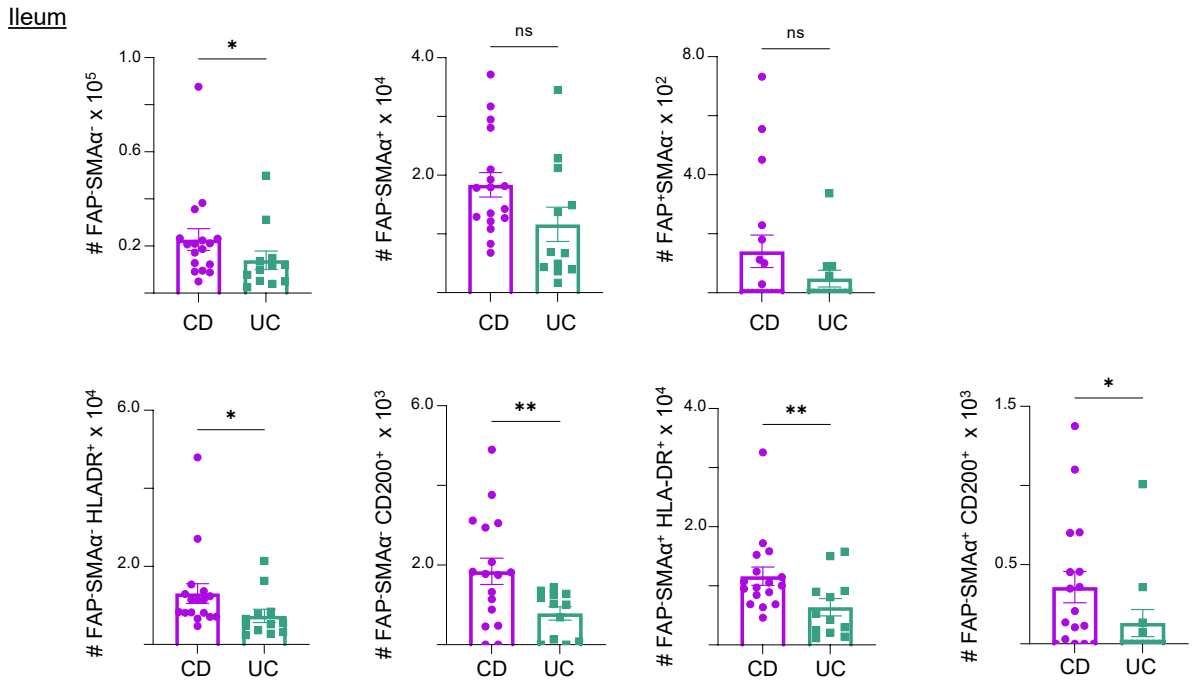**D**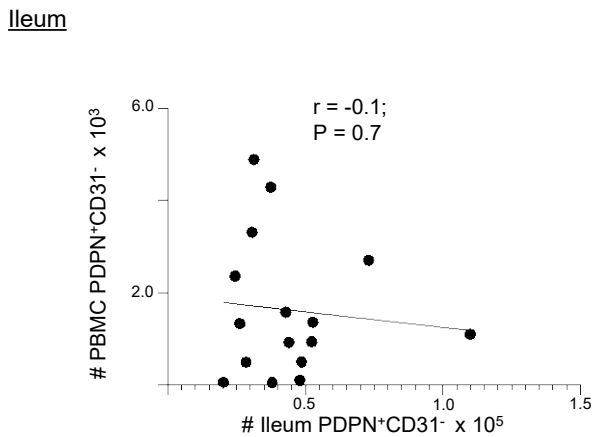

**Supplementary Figure 1. Stromal cell characterization in state of inflammatory pathology and types of IBD.** (A) Summary cell counts for fibroblast (PDPN<sup>+</sup>CD31<sup>-</sup>) and endothelial cell (PDPN<sup>-</sup>CD31<sup>+</sup>) in inflamed versus noninflamed ileum and colon tissue samples. (B) Summary cell counts of fibroblasts, endothelial cells and epithelial cells (PDPN<sup>-</sup>CD31<sup>-</sup>EpCAM<sup>+</sup>) in ileum from CD and UC patients. (C) Summary cell counts for fibroblast subsets in ileum from CD and UC patients. (D) Pearson correlation of PDPN<sup>+</sup>CD31<sup>-</sup> cells in ileum and PBMCs. Cell counts are normalized to counts per million. Each data point represents one sample from a patient (mean ± SEM), \* $p < 0.05$ , \*\* $p < 0.01$ .
