# Supplementary material for: Stromal-Like Cells Are Found in Peripheral Blood of Patients With Inflammatory Bowel Disease and Correlate With Immune Activation State
Source: PubMed Central journal article supplement — Clin Transl Gastroenterol. 2024 Jun 1;15(9):e1. doi: 10.14309/ctg.0000000000000721 (PMC11421714; doi:10.14309/ctg.0000000000000721), 2024-06-01
Supplement: ct9-15-e1e-s002.pdf [file ct9-15-e1e-s002.pdf]

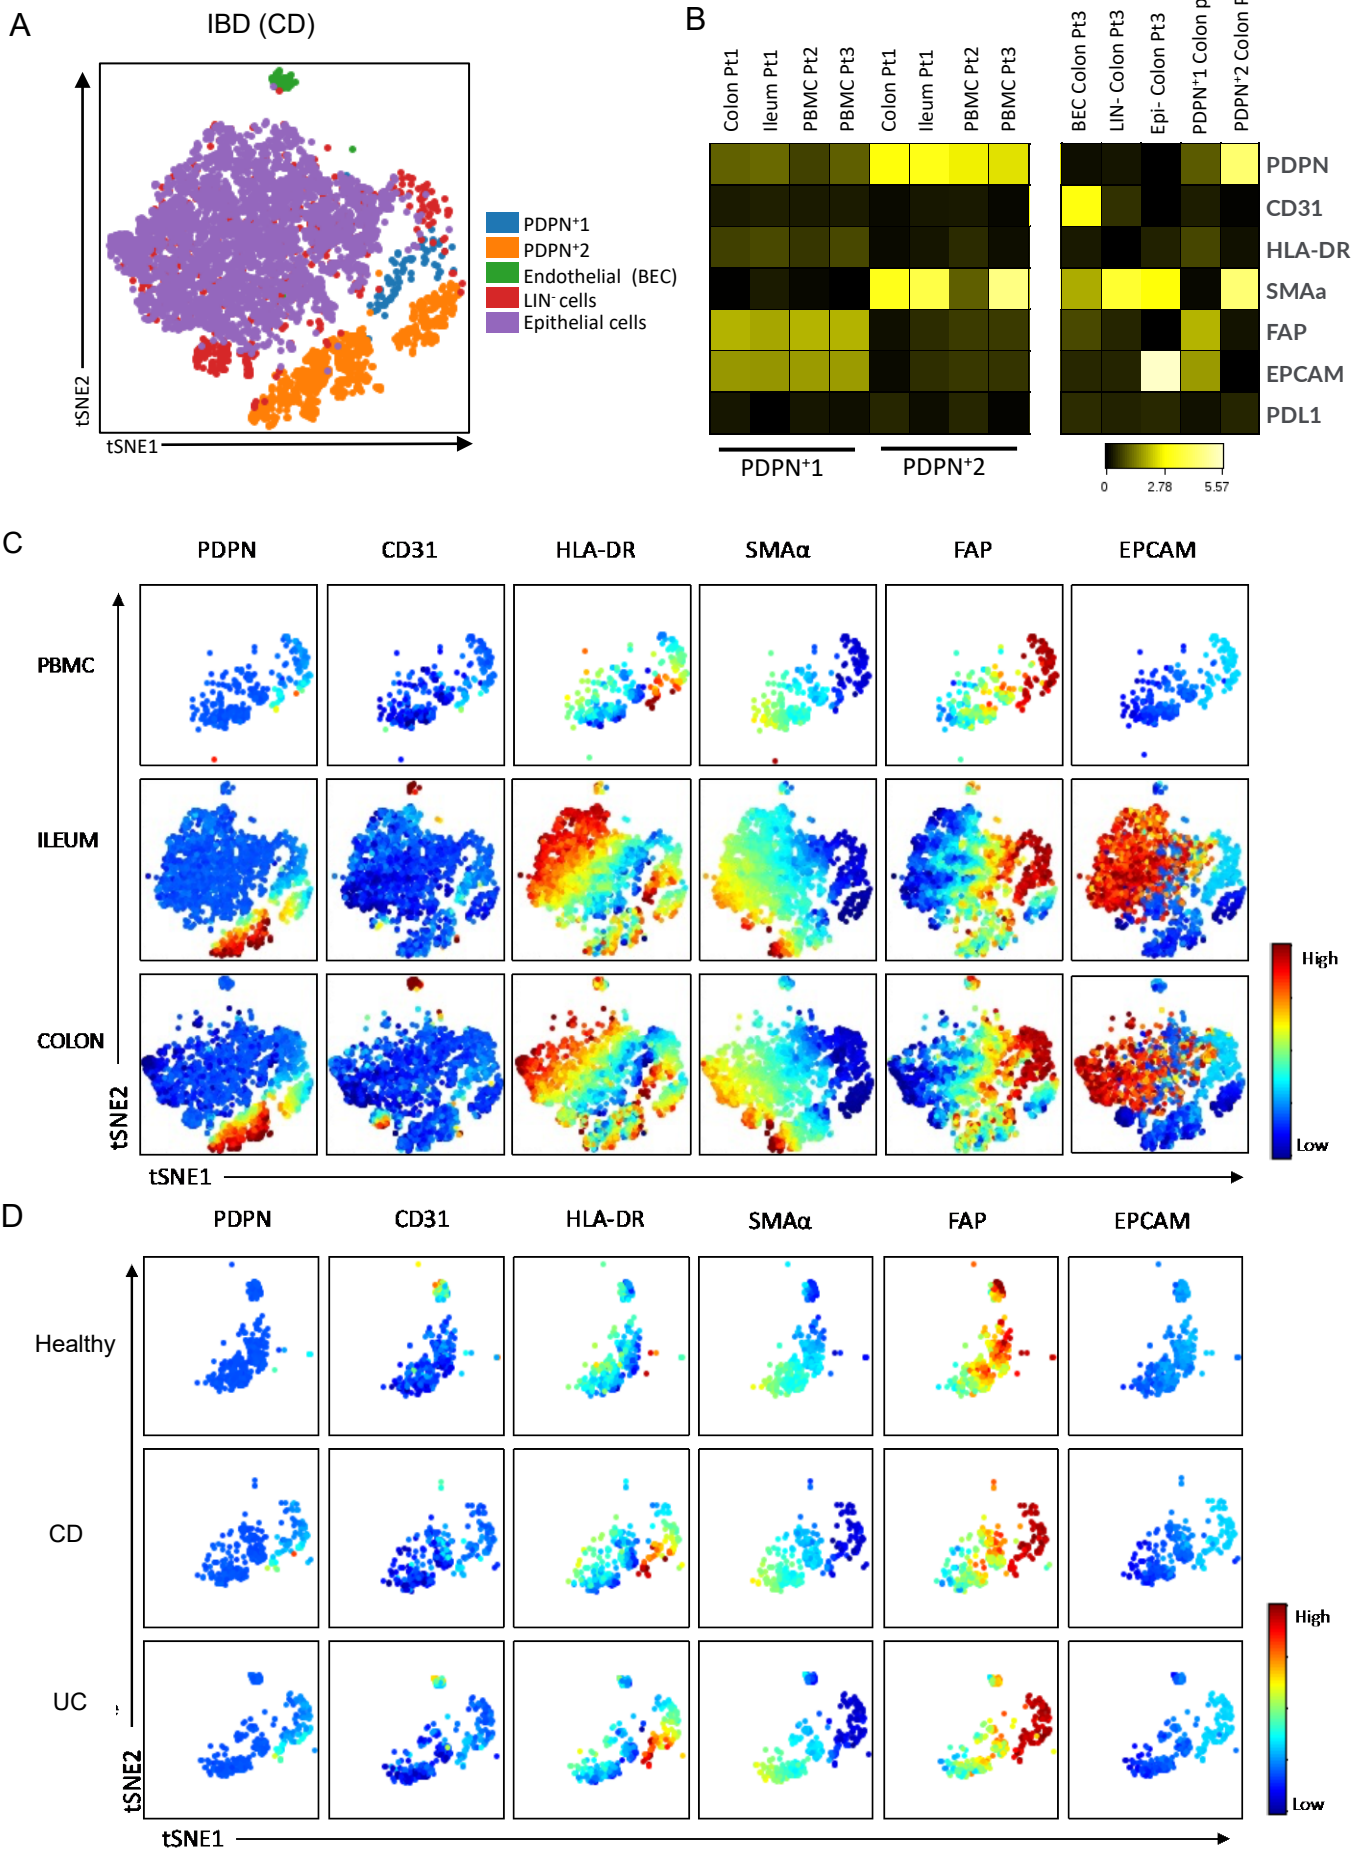

**Supplementary Figure 2. Assessment of non-hematopoietic cell markers in the blood, ileum, and colon of IBD patients.** The non-hematopoietic cell population (CD45<sup>-</sup>CD3<sup>-</sup>CD19<sup>-</sup> excluding dead cells and doublets) identified by spectral flow cytometry profiling were subjected to SPADE on viSNE analysis. (A) Overlaid viSNE plot on SPADE clustered populations as indicated of an IBD ileum sample. The CD45<sup>-</sup>CD3<sup>-</sup>CD19<sup>-</sup>PDPN<sup>-</sup>CD31<sup>-</sup>EpCam<sup>-</sup> non-hematopoietic cell population is designated as Lin<sup>-</sup>. (B) Heatmap on the indicated samples and markers. Color scale is generated based on the transformed ratio by the row's minimum of mean of channel. (C) viSNE plots of the indicated markers of representative CD patient PBMC, ileum and colon samples. (D) viSNE plots of the indicated markers of representative PMBC samples from healthy control, CD, and UC patients. Pt1, patient 1; Pt2, patient 2; Pt3, patient 3.
