# Supplementary material for: Stromal-Like Cells Are Found in Peripheral Blood of Patients With Inflammatory Bowel Disease and Correlate With Immune Activation State
Source: PubMed Central journal article supplement — Clin Transl Gastroenterol. 2024 Jun 1;15(9):e1. doi: 10.14309/ctg.0000000000000721 (PMC11421714; doi:10.14309/ctg.0000000000000721), 2024-06-01
Supplement: ct9-15-e1e-s003.pdf [file ct9-15-e1e-s003.pdf]

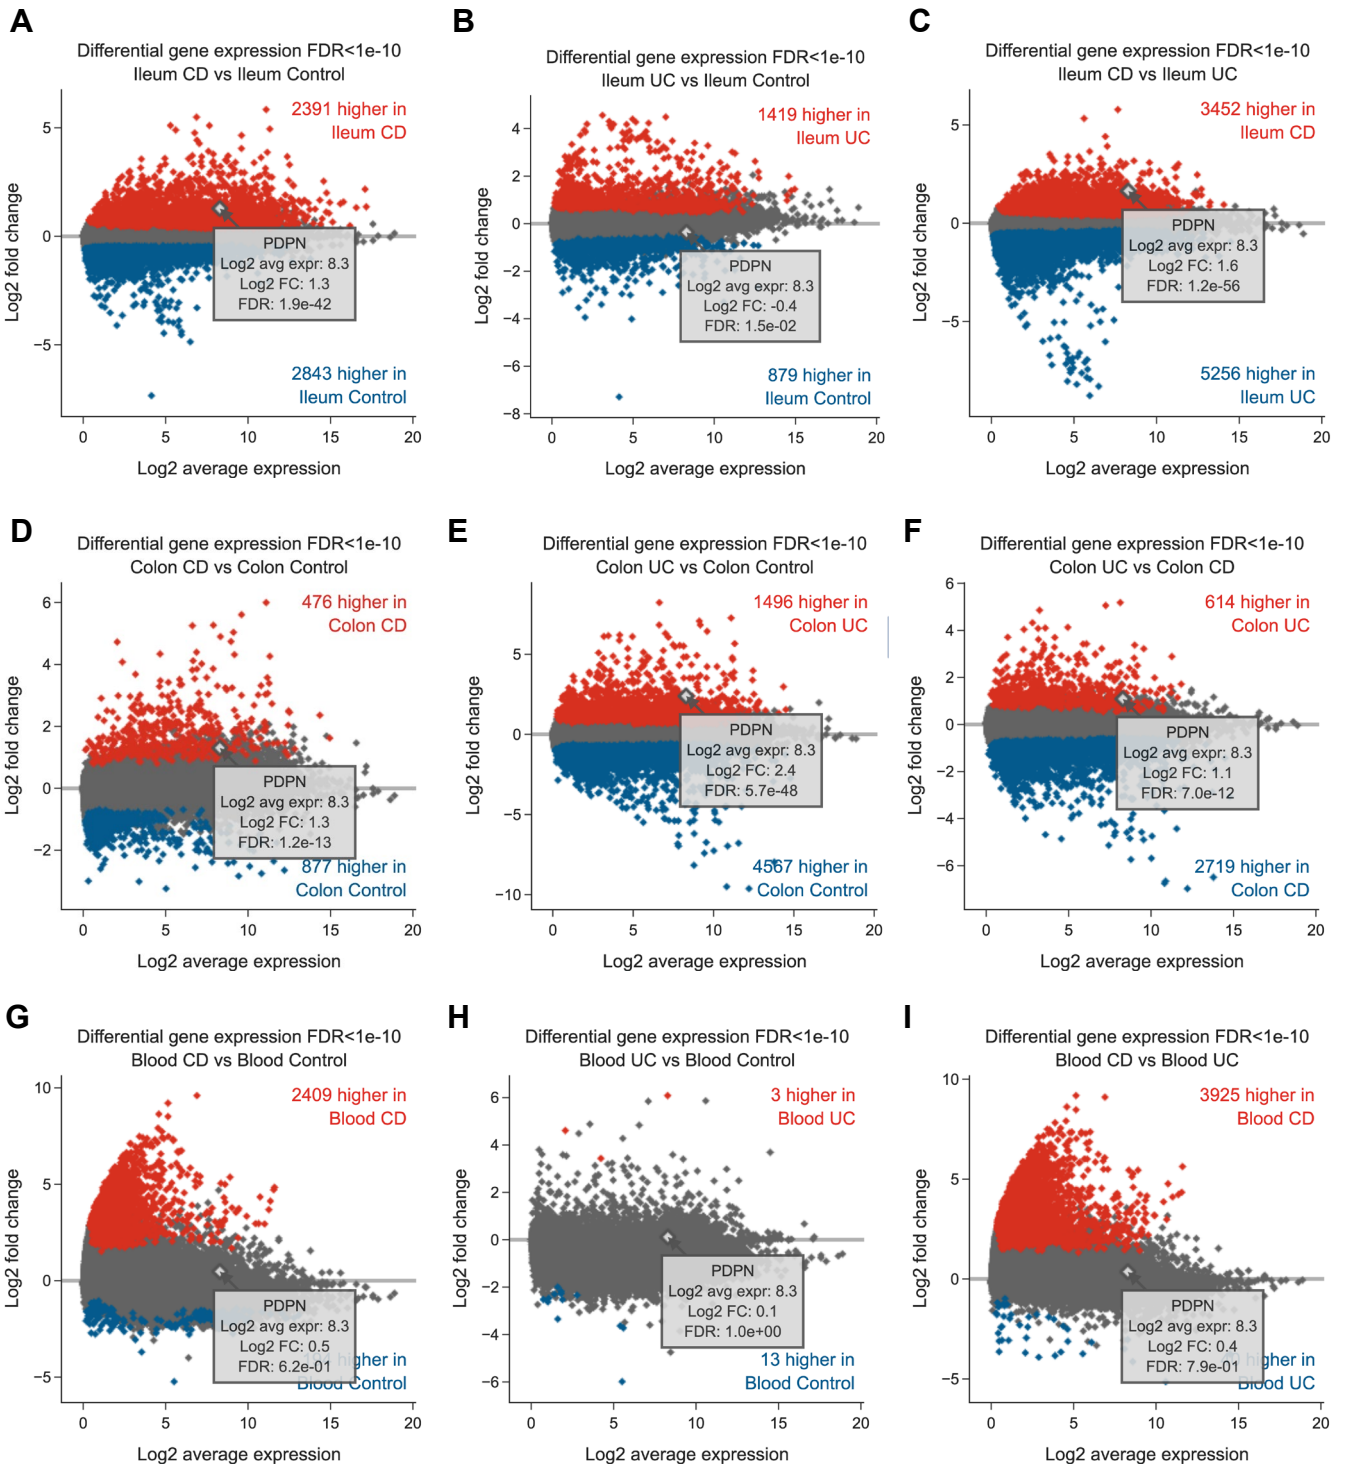

Supplementary Figure 3

**Supplementary Figure 3. Differential PDPN mRNA expression in IBD transcriptome.**

Podoplanin (PDPN) expression in gut tissue and blood was examined using IBD TaMMA (Transcriptome and Metatranscriptome Meta-Analysis). Differential gene expression between controls, CD, and UC are shown in the ileum (n = 261 control, 1382 CD, 205 UC) (A,B,C), colon (n = 123 control, 156 CD, 169 UC) (D,E,F), and blood (n = 12 control, 158 CD, 15 UC) (G,H,I). Log<sub>2</sub> fold change (FC) and false discovery rate (FDR) for PDPN expression are listed in the gray box of each plot.
