# Supplementary material for: Stromal-Like Cells Are Found in Peripheral Blood of Patients With Inflammatory Bowel Disease and Correlate With Immune Activation State
Source: PubMed Central journal article supplement — Clin Transl Gastroenterol. 2024 Jun 1;15(9):e1. doi: 10.14309/ctg.0000000000000721 (PMC11421714; doi:10.14309/ctg.0000000000000721), 2024-06-01
Supplement: ct9-15-e1e-s004.pdf [file ct9-15-e1e-s004.pdf]

A

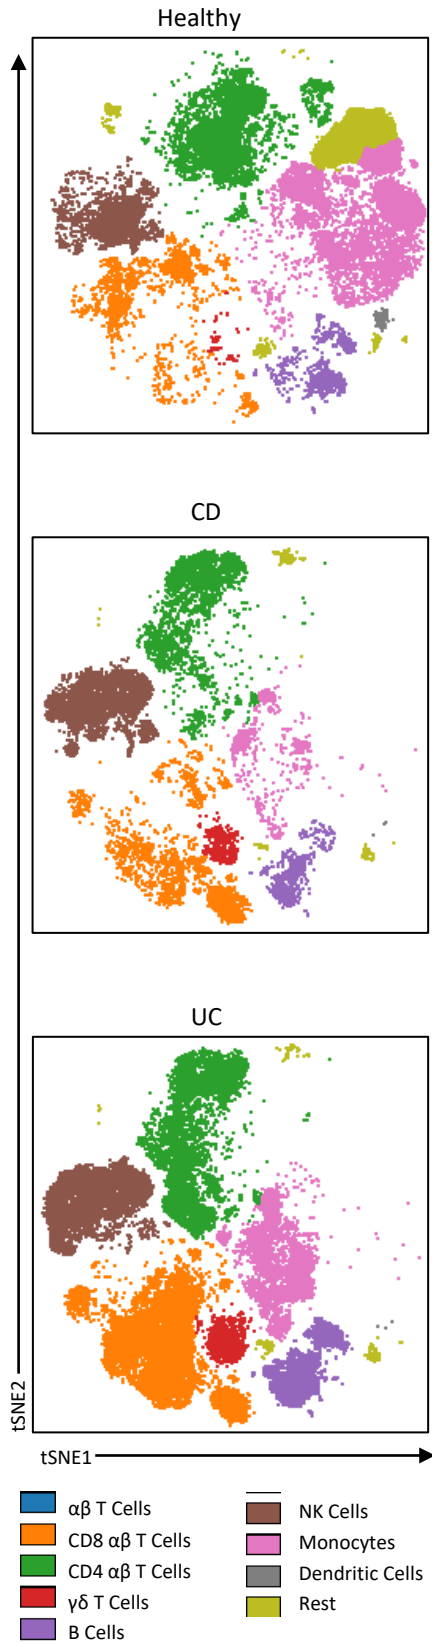

B

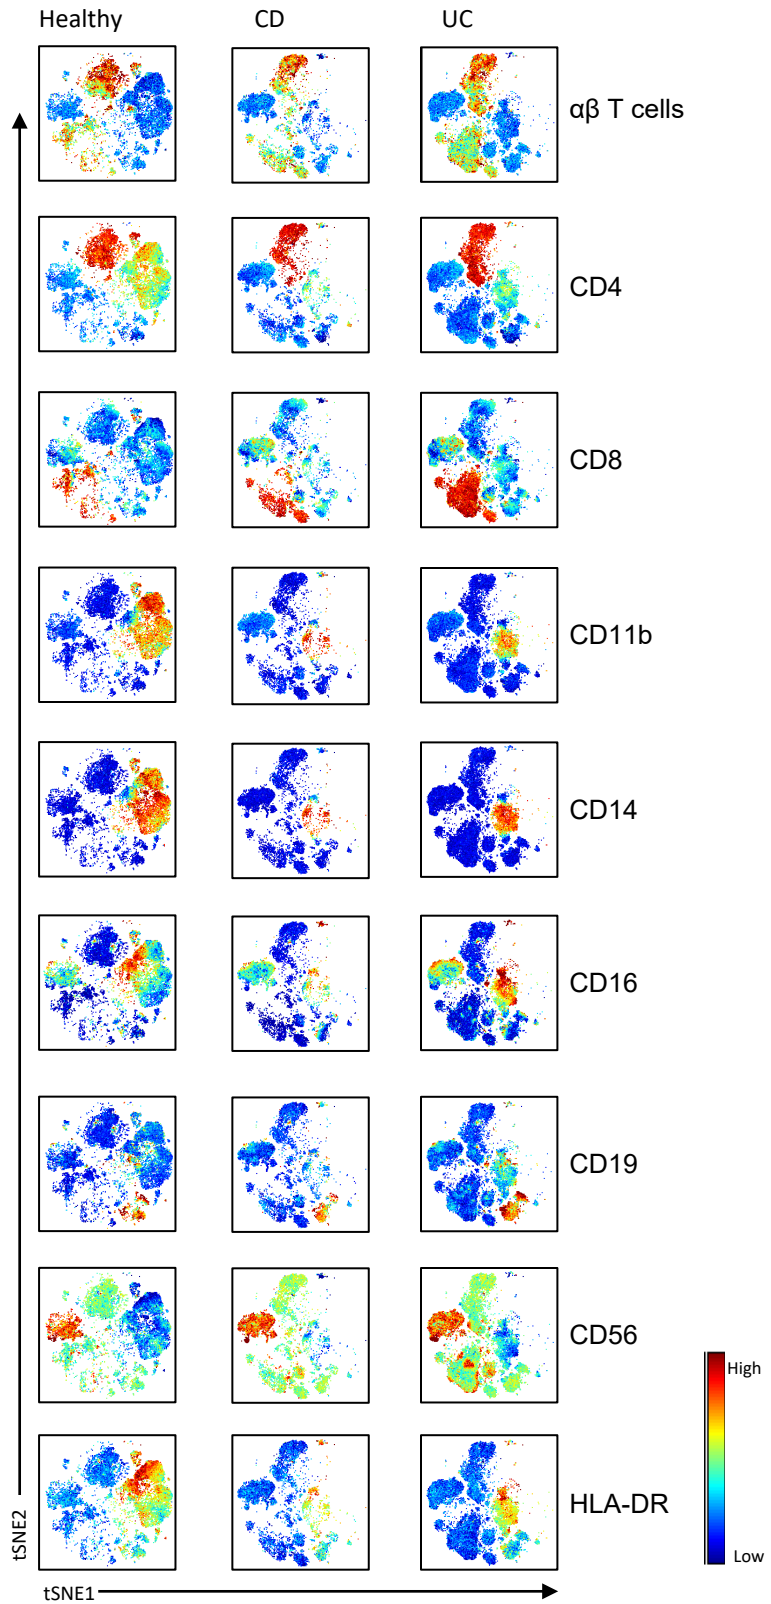

**Supplementary Figure 4. Assessment of hematopoietic cell markers in the blood of healthy, CD, and UC patients.** The hematopoietic cell population (CD45<sup>+</sup> excluding dead cells and doublets) identified by spectral flow cytometry profiling were subjected to SPADE on viSNE analysis. (A) Overlaid viSNE plots on SPADE clustered populations are shown for representative healthy, CD, and UC samples. (B) viSNE plots of the indicated markers of representative PMBC samples from healthy control, CD, and UC patients.
