# Supplementary material for: Stromal-Like Cells Are Found in Peripheral Blood of Patients With Inflammatory Bowel Disease and Correlate With Immune Activation State
Source: PubMed Central journal article supplement — Clin Transl Gastroenterol. 2024 Jun 1;15(9):e1. doi: 10.14309/ctg.0000000000000721 (PMC11421714; doi:10.14309/ctg.0000000000000721), 2024-06-01
Supplement: ct9-15-e1e-s005.pdf [file ct9-15-e1e-s005.pdf]

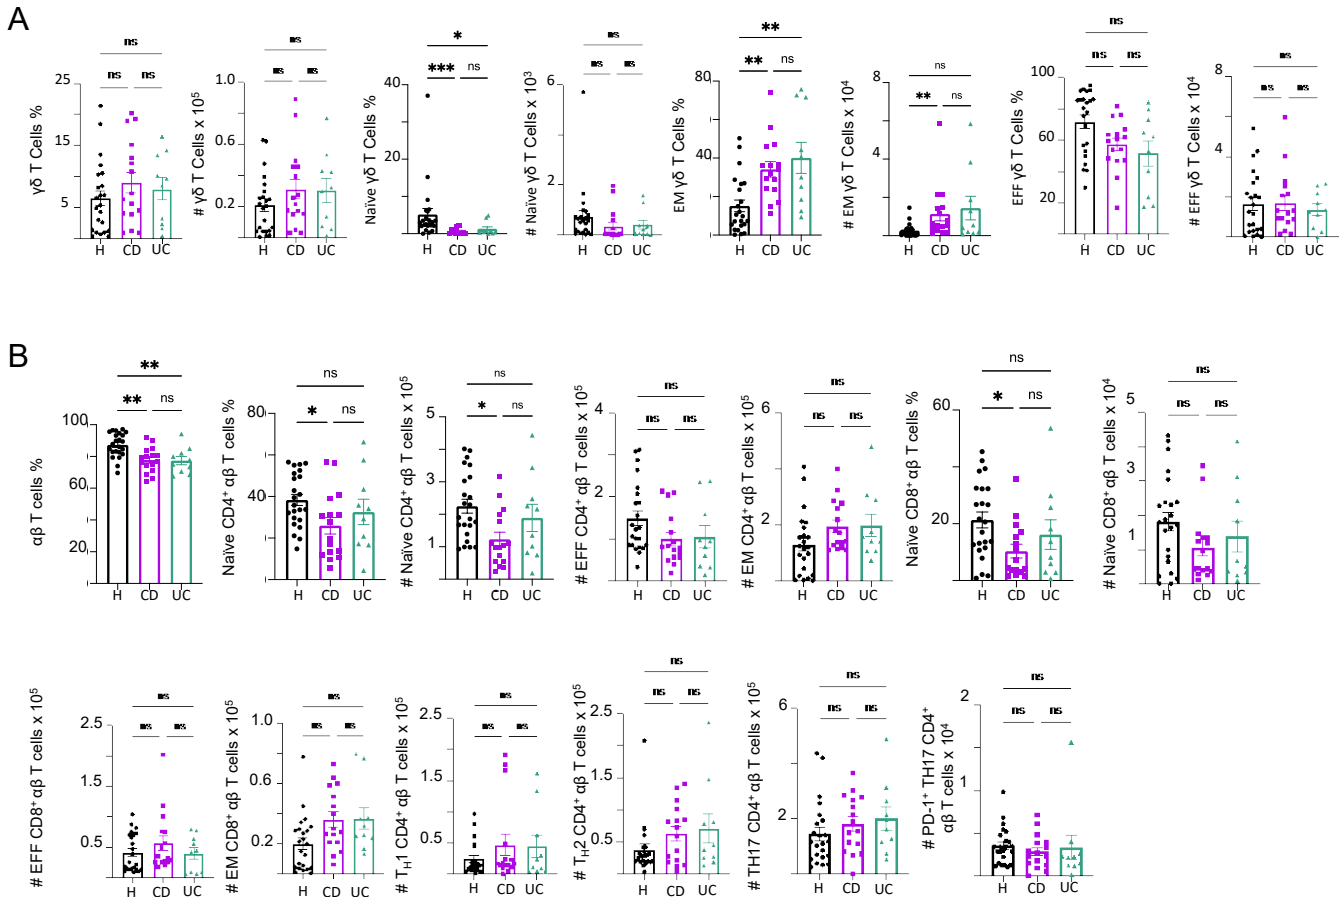

**Supplementary Figure 5. Profiles of  $\gamma\delta$  T cell and  $\alpha\beta$  T cell activation, differentiation and memory in blood samples from IBD patients.** Naïve and memory T cell populations were characterized based on commonly recognized phenotypes: Naïve, CCR7<sup>+</sup>CD45RA<sup>+</sup>; central memory (CM), CCR7<sup>+</sup>CD45RA<sup>-</sup>CD27<sup>+</sup>; effector (EFF), CCR7<sup>-</sup>CD27<sup>-</sup>; effector memory (EM), CCR7<sup>-</sup>CD27<sup>+</sup>. (A) Summary percentages and cell counts of naïve, EFF, and EM  $\gamma\delta$  T cells in PBMC samples from healthy controls compared to IBD patients (top row). (B) Summary percentages of  $\alpha\beta$  T cells and cell counts of T cell subsets in PBMCs from healthy controls compared to CD or UC samples. Cell counts are normalized to counts per million. Each data point represents one sample from a patient (mean  $\pm$  SEM), \* $p$  < 0.05, \*\* $p$  < 0.01, \*\*\* $p$  < 0.001.
