# Supplementary material for: Stromal-Like Cells Are Found in Peripheral Blood of Patients With Inflammatory Bowel Disease and Correlate With Immune Activation State
Source: PubMed Central journal article supplement — Clin Transl Gastroenterol. 2024 Jun 1;15(9):e1. doi: 10.14309/ctg.0000000000000721 (PMC11421714; doi:10.14309/ctg.0000000000000721), 2024-06-01
Supplement: ct9-15-e1e-s006.pdf [file ct9-15-e1e-s006.pdf]

A

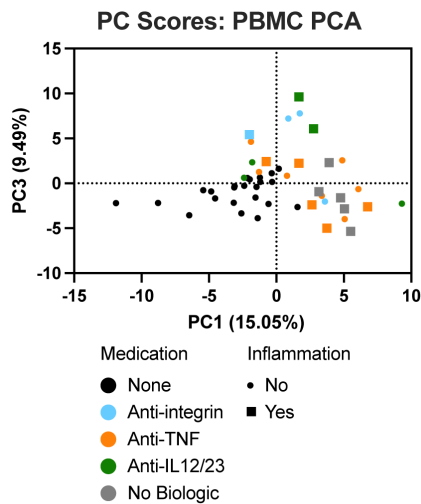

B

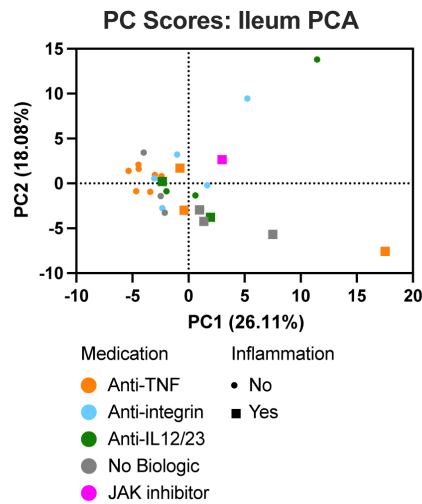

C

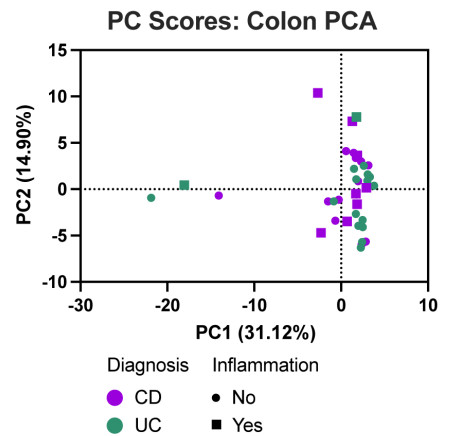

**Supplementary Figure 6. Principal component analysis (PCA) using the cell subtypes identified by spectral flow cytometry as variables.** Unsupervised clustering via principal component analysis was performed on PBMC samples (n=49) (A), ileum samples (n=29) (B), and colon samples (n=38) (C). Cell counts determined through manual gating were used as variables (110 cell subtypes for PBMC samples, 98 for ileum samples, 101 for colon samples). Only cell subtypes with >0 counts in at least five samples were included as variables. Each sample is represented by a dot, where color indicates medication or diagnosis, and the shape (square or circle) indicates with or without active inflammation.
